# Supplementary material for: Effective bridging therapy can improve CD19 CAR-T outcomes while maintaining safety in patients with large B-cell lymphoma
Source: PubMed Central journal article supplement — Blood Adv. 2023 Feb 3;7(12):2872–83. doi: 10.1182/bloodadvances.2022009019 (PMC10300297; doi:10.1182/bloodadvances.2022009019), 2023-02-03
Supplement: BLOODA_ADV-2022-009019-mmc1.pdf [file BLOODA_ADV-2022-009019-mmc1.pdf]

## **TITLE:**

Effective bridging therapy can improve CD19 CAR-T outcomes while maintaining safety in patients with large B-cell lymphoma.

## **TABLE OF CONTENTS:**

### **1. Supplementary Methods**

- a. Patients
- b. Disease and toxicity assessment

### **2. Supplementary Tables**

- a. Sup. Table 1. Chemotherapy bridging details.
- b. Sup. Table 2: Demographics for all infused patients at submission.
- c. Sup. Table 3: Demographics for all leukapheresed patients at submission by BT.
- d. Sup. Table 4: Bridging chemotherapy and patient demographics by time period.
- e. Sup. Table 5: Toxicity from CAR-T by CT type.
- f. Sup. Table 6: Toxicity according to bridging response.
- g. Sup. Table 7: CAR-T response in the non-responders to BT, by product
- h. Sup. Table 8: Baseline characteristics of the infused non-responders by product.

## **SUP. METHODS**

### **a. Patients**

Data was collected retrospectively from electronic medical records for consecutive patients with r/r LBCL submitted to the UK National CAR Clinical Panel (NCCP) for approval of treatment with licenced CD19CAR-T at commissioned CAR-T centres (Newcastle Hospitals NHS Foundation Trust; King's College Hospital London; University College London Hospital; Manchester Royal Infirmary, The Christie NHS Foundation Trust (Manchester), Leeds Teaching Hospitals NHS Trust; University Hospital of Wales (Cardiff); University Hospitals Bristol NHS Trust; Royal Marsden Hospital; Cambridge University Hospitals NHS Foundation Trust). An additional 12 patients approved by the NCCP equivalent Scottish CAR-T centre (NHS Greater Glasgow and Clyde) using similar eligibility criteria were included. Eligibility for CAR-T on the National Health Service (NHS) CAR programme for LBCL requires for patients to be  $\geq 18$  years, to have failed  $\geq 2$  lines of therapy, have adequate organ function and an ECOG performance status of 0-1 (0-2 at the point of lymphodepletion (LD)). Patients' eligibility for CAR-T was assessed at the treating CAR-T centre and centrally reviewed by the National CAR-T Clinical Panel (NCCP). All histological diagnoses have been reviewed by a dedicated haematopathologist. The choice of CAR-T product was at the discretion of the treating centre. LD comprising cyclophosphamide and fludarabine was delivered as per SmPC and local guidelines.

## b. Disease and toxicity assessment

Cytokine release syndrome (CRS) and Immune effector cell-associated neurotoxicity syndrome (ICANS) grading was performed as per ASTCT consensus guidelines<sup>25</sup>. Treatment response was assessed locally by positron emission tomography (PET-CT) pre-bridging, pre-LD and again at months 1, 3, 6, 9 and 12 post-CAR-T according to Lugano classification<sup>26,27</sup>.

### SUP TABLES:

*Sup. Table 1: Chemotherapy bridging details.*

| Regimens Used                         | CT<br>N=212 |                                           | CMT<br>N=16 |                                           |
|---------------------------------------|-------------|-------------------------------------------|-------------|-------------------------------------------|
|                                       | N           | Number of cycles<br>Median (IQR)<br>Range | N           | Number of cycles<br>Median (IQR)<br>Range |
| <b>HDT-Gem</b>                        | <b>35</b>   | <b>1 (1-1)<br/>1-4</b>                    | <b>2</b>    | <b>1 and 3</b>                            |
| <i>(R)-GDP</i>                        | 15          |                                           | 2           |                                           |
| <i>(R)-GemOx</i>                      | 13          |                                           | 0           |                                           |
| <i>R-GemP</i>                         | 4           |                                           | 0           |                                           |
| <i>R-GVD</i>                          | 1           |                                           | 0           |                                           |
| <i>Gem/pred</i>                       | 1           |                                           | 0           |                                           |
| <i>Gem</i>                            | 1           |                                           | 0           |                                           |
| <b>HDT-Ifos</b>                       | <b>28</b>   | <b>1 (1-1)<br/>1-4</b>                    | <b>3</b>    | <b>1,1,1</b>                              |
| <i>(R)-IVE</i>                        | 17          |                                           | 3           |                                           |
| <i>(R)-ICE</i>                        | 7           |                                           | 0           |                                           |
| <i>(R)-IGEVI</i>                      | 2           |                                           | 0           |                                           |
| <i>R-IVAC</i>                         | 1           |                                           | 0           |                                           |
| <i>Modified DECC and IVE</i>          | 1           |                                           | 0           |                                           |
| <b>HDT-Other</b>                      | <b>21</b>   | <b>1 (1-1)<br/>1-2</b>                    | <b>2</b>    | <b>1 and 1</b>                            |
| <i>(R)-CHOP</i>                       | 5           |                                           | 0           |                                           |
| <i>(R)-DHAP</i>                       | 4           |                                           | 0           |                                           |
| <i>Mini-BEAM</i>                      | 3           |                                           | 0           |                                           |
| <i>(R)-ESHAP</i>                      | 2           |                                           | 0           |                                           |
| <i>MATRIX</i>                         | 2           |                                           | 0           |                                           |
| <i>(R)-HDMTX/R-MTX</i>                | 0           |                                           | 2           |                                           |
| <i>(R)-CVP</i>                        | 1           |                                           | 0           |                                           |
| <i>Mini-LEAM</i>                      | 1           |                                           | 0           |                                           |
| <i>HD-MTX + Cytarabine</i>            | 1           |                                           | 0           |                                           |
| <i>Methypred/Etoposide/Epirubicin</i> | 1           |                                           | 0           |                                           |
| <i>R-cytarabine-Pred</i>              | 1           |                                           | 0           |                                           |
| <b>Low Dose</b>                       | <b>51</b>   | <b>1 (1-1)<br/>1-3</b>                    | <b>2</b>    | <b>1 and 3</b>                            |
| <i>DECC</i>                           | 20          |                                           | 1           |                                           |
| <i>(R)-Bendamustine</i>               | 6           |                                           | 1           |                                           |
| <i>PEP-C</i>                          | 6           |                                           | 0           |                                           |
| <i>PMiTceBo</i>                       | 4           |                                           | 0           |                                           |
| <i>CCEP</i>                           | 3           |                                           | 0           |                                           |
| <i>Oral Etoposide+ Pred</i>           | 3           |                                           | 0           |                                           |
| <i>(R)-lenalidomide</i>               | 3           |                                           | 0           |                                           |
| <i>Cyclo-dex</i>                      | 2           |                                           | 0           |                                           |
| <i>Rituximab</i>                      | 2           |                                           | 0           |                                           |
| <i>RPCE2BO</i>                        | 1           |                                           | 0           |                                           |
| <i>Vinblastine &amp; Dex</i>          | 1           |                                           | 0           |                                           |
| <b>RBP</b>                            | <b>77</b>   | <b>1 (1-2)<br/>1-7</b>                    | <b>7</b>    | <b>1 (1-2)<br/>1-3</b>                    |
| <i>RBP</i>                            | 70          |                                           | 7           |                                           |
| <i>RP</i>                             | 6           |                                           | 0           |                                           |

**Sup. Table 2: Demographics for all infused patients at submission.**

|                                        | No bridging<br>N=40 | Bridging therapy |               |               |               | p-value<br>none vs<br>RT | p-value<br>none vs CT | p-value<br>steroids vs<br>none | p-value<br>steroids vs<br>RT | p-value<br>steroids<br>vs CT | p-value CT<br>vs RT |
|----------------------------------------|---------------------|------------------|---------------|---------------|---------------|--------------------------|-----------------------|--------------------------------|------------------------------|------------------------------|---------------------|
|                                        |                     | Steroids<br>N=29 | RT<br>N=54    | CT<br>N=166   | CMT<br>N=11   |                          |                       |                                |                              |                              |                     |
| <b>Age</b>                             | 62.0(57 – 67.5)     | 57.0(50 – 63)    | 57.0(49 – 65) | 59.0(49 – 67) | 59.0(32 – 66) | 0.030                    | 0.12                  | 0.047                          | >0.99                        | 0.57                         | 0.38                |
| <b>Sex, N (%)</b>                      |                     |                  |               |               |               |                          |                       |                                |                              |                              |                     |
| Male                                   | 24 (60.0)           | 17 (58.6)        | 33 (61.1)     | 105 (63.3)    | 6 (54.5)      | >0.99                    | 0.72                  | >0.99                          | >0.99                        | 0.68                         | 0.87                |
| Female                                 | 16 (40.0)           | 12 (41.4)        | 21 (38.9)     | 61 (36.7)     | 5 (45.5)      |                          |                       |                                |                              |                              |                     |
| <b>Disease type, N (%)</b>             |                     |                  |               |               |               |                          |                       |                                |                              |                              |                     |
| De novo DLBCL                          | 26 (65.0)           | 19 (65.5)        | 34 (63.0)     | 115 (69.3)    | 6 (54.5)      | 0.82                     | 0.90                  | 0.40                           | 0.55                         | 0.30                         | 0.54                |
| PMBL                                   | 3 (7.5)             | 0                | 4 (7.4)       | 10 (6.0)      | 2 (18.2)      |                          |                       |                                |                              |                              |                     |
| tFL                                    | 8 (20.0)            | 9 (31.0)         | 14 (25.9)     | 30 (18.1)     | 3 (27.3)      |                          |                       |                                |                              |                              |                     |
| t-Other                                | 3 (7.5)             | 1 (3.4)          | 2 (3.7)       | 11 (6.6)      | 0             |                          |                       |                                |                              |                              |                     |
| <b>DHL/THL, N (%)</b>                  |                     |                  |               |               |               |                          |                       |                                |                              |                              |                     |
| No                                     | 24 (77.4)           | 18 (69.2)        | 33 (67.3)     | 101 (70.6)    | 5 (62.5)      | 0.45                     | 0.63                  | 0.74                           | 0.87                         | 0.89                         | 0.87                |
| Yes                                    | 2 (6.5)             | 3 (11.5)         | 8 (16.3)      | 20 (14.0)     | 0             |                          |                       |                                |                              |                              |                     |
| DE/TE                                  | 5 (16.1)            | 5 (19.2)         | 8 (16.3)      | 22 (15.4)     | 3 (37.5)      |                          |                       |                                |                              |                              |                     |
| Missing/unknown                        | 9                   | 3                | 5             | 23            | 3             |                          |                       |                                |                              |                              |                     |
| <b>Stage, N (%)</b>                    |                     |                  |               |               |               |                          |                       |                                |                              |                              |                     |
| Stage 1-2                              | 12 (31.6)           | 6 (20.7)         | 16 (30.2)     | 28 (17.0)     | 2 (18.2)      | >0.99                    | 0.068                 | 0.41                           | 0.44                         | 0.60                         | 0.049               |
| Stage 3-4                              | 26 (68.4)           | 23 (79.3)        | 37 (69.8)     | 137 (83.0)    | 9 (81.8)      |                          |                       |                                |                              |                              |                     |
| Missing/unknown                        | 2                   | 0                | 1             | 1             | 0             |                          |                       |                                |                              |                              |                     |
| <b>ECOG, N (%)</b>                     |                     |                  |               |               |               |                          |                       |                                |                              |                              |                     |
| 0                                      | 27 (67.5)           | 17 (58.6)        | 29 (53.7)     | 71 (42.8)     | 3 (27.3)      | 0.21                     | 0.008                 | 0.46                           | 0.82                         | 0.16                         | 0.21                |
| 1                                      | 13 (32.5)           | 12 (41.4)        | 25 (46.3)     | 95 (57.2)     | 8 (72.7)      |                          |                       |                                |                              |                              |                     |
| <b>Bulk&gt;7.5cm, N (%)</b>            |                     |                  |               |               |               |                          |                       |                                |                              |                              |                     |
| No                                     | 33 (82.5)           | 24 (82.8)        | 34 (63.0)     | 120 (72.3)    | 8 (72.7)      | 0.42                     | 0.23                  | >0.99                          | 0.080                        | 0.36                         | 0.23                |
| Yes                                    | 7 (17.5)            | 5 (17.2)         | 20 (37.0)     | 46 (27.7)     | 3 (27.3)      |                          |                       |                                |                              |                              |                     |
| Missing/unknown                        | 33 (82.5)           | 24 (82.8)        | 34 (63.0)     | 120 (72.3)    | 8 (72.7)      |                          |                       |                                |                              |                              |                     |
| <b>No. of extra nodal sites, N (%)</b> |                     |                  |               |               |               |                          |                       |                                |                              |                              |                     |
| None                                   | 21 (52.5)           | 11 (39.3)        | 22 (40.7)     | 53 (31.9)     | 2 (18.2)      | 0.23*                    | 0.007*                | 0.15*                          | 0.60*                        | 0.64*                        | 0.13                |
| 1-2                                    | 18 (45.0)           | 13 (46.4)        | 29 (53.7)     | 93 (56.0)     | 6 (54.5)      |                          |                       |                                |                              |                              |                     |
| 3+                                     | 1 (2.5)             | 4 (14.3)         | 3 (5.6)       | 20 (12.0)     | 3 (27.3)      |                          |                       |                                |                              |                              |                     |
| Missing/unknown                        | 0                   | 1                | 0             | 0             | 0             |                          |                       |                                |                              |                              |                     |
| <b>LDH, N (%)</b>                      |                     |                  |               |               |               |                          |                       |                                |                              |                              |                     |
| <ULN                                   | 12 (30.8)           | 9 (31.0)         | 15 (30.6)     | 32 (20.0)     | 0             | 0.36*                    | 0.013*                | 0.758                          | 0.61*                        | 0.080*                       | 0.19                |
| >ULN                                   | 24 (61.5)           | 16 (55.2)        | 23 (46.9)     | 85 (53.1)     | 8 (80.0)      |                          |                       |                                |                              |                              |                     |
| >2ULN                                  | 3 (7.7)             | 4 (13.8)         | 11 (22.4)     | 43 (26.9)     | 2 (20.0)      |                          |                       |                                |                              |                              |                     |
| Missing/unknown                        | 1                   | 0                | 5             | 6             | 1             |                          |                       |                                |                              |                              |                     |
| <b>IPI , N (%)</b>                     |                     |                  |               |               |               |                          |                       |                                |                              |                              |                     |
| 0-2                                    | 23 (63.9)           | 17 (58.6)        | 27 (55.1)     | 75 (46.9)     | 7 (63.6)      | 0.51                     | 0.096                 | 0.80                           | 0.82                         | 0.31                         | 0.33                |
| 3+                                     | 13 (36.1)           | 12 (41.4)        | 22 (44.9)     | 85 (53.1)     | 4 (36.4)      |                          |                       |                                |                              |                              |                     |

|                                                                     | No bridging<br>N=40 | Bridging therapy |            |             |             | p-value<br>none vs<br>RT | p-value<br>none vs CT | p-value<br>steroids vs<br>none | p-value<br>steroids vs<br>RT | p-value<br>steroids<br>vs CT | p-value CT<br>vs RT |
|---------------------------------------------------------------------|---------------------|------------------|------------|-------------|-------------|--------------------------|-----------------------|--------------------------------|------------------------------|------------------------------|---------------------|
|                                                                     |                     | Steroids<br>N=29 | RT<br>N=54 | CT<br>N=166 | CMT<br>N=11 |                          |                       |                                |                              |                              |                     |
| Missing/unknown                                                     | 4                   | 0                | 5          | 6           | 0           |                          |                       |                                |                              |                              |                     |
| <b>Fit for SCT?, N (%)</b>                                          |                     |                  |            |             |             |                          |                       |                                |                              |                              |                     |
| No                                                                  | 7 (17.5)            | 6 (20.7)         | 5 (9.3)    | 32 (19.3)   | 3 (27.3)    | 0.35                     | >0.99                 | 0.76                           | 0.18                         | 0.80                         | 0.097               |
| Yes                                                                 | 33 (82.5)           | 23 (79.3)        | 49 (90.7)  | 134 (80.7)  | 8 (72.7)    |                          |                       |                                |                              |                              |                     |
| <b>HCT-CI score, N (%)</b>                                          |                     |                  |            |             |             |                          |                       |                                |                              |                              |                     |
| <3                                                                  | 38 (95.0)           | 25 (86.2)        | 51 (96.2)  | 151 (92.1)  | 9 (81.8)    | >0.99                    | 0.74                  | 0.23                           | 0.18                         | 0.29                         | 0.53                |
| ≥3                                                                  | 2 (5.0)             | 4 (13.8)         | 2 (3.8)    | 13 (7.9)    | 2 (18.2)    |                          |                       |                                |                              |                              |                     |
| Missing/unknown                                                     | 0                   | 0                | 1          | 2           | 0           |                          |                       |                                |                              |                              |                     |
| <b>Life expectancy &lt;3 months if<br/>no response to BT, N (%)</b> |                     |                  |            |             |             |                          |                       |                                |                              |                              |                     |
| No                                                                  | 39 (97.5)           | 19 (67.9)        | 39 (72.2)  | 103 (62.0)  | 10 (90.9)   | 0.002                    | <0.001                | 0.001                          | 0.80                         | 0.67                         | 0.19                |
| Yes                                                                 | 1 (2.5)             | 9 (32.1)         | 15 (27.8)  | 63 (38.0)   | 1 (9.1)     |                          |                       |                                |                              |                              |                     |
| Missing/unknown                                                     | 0                   | 1                | 0          | 0           | 0           |                          |                       |                                |                              |                              |                     |
| <b>&gt;2 previous lines, N (%)</b>                                  |                     |                  |            |             |             |                          |                       |                                |                              |                              |                     |
| No                                                                  | 24 (60.0)           | 14 (48.3)        | 39 (72.2)  | 100 (60.2)  | 9 (81.8)    | 0.27                     | >0.99                 | 0.46                           | 0.054                        | 0.31                         | 0.14                |
| Yes                                                                 | 16 (40.0)           | 15 (51.7)        | 15 (27.8)  | 66 (39.8)   | 2 (18.2)    |                          |                       |                                |                              |                              |                     |
| <b>Previous transplant, N (%)</b>                                   |                     |                  |            |             |             |                          |                       |                                |                              |                              |                     |
| No                                                                  | 34 (85.0)           | 25 (86.2)        | 45 (83.3)  | 138 (83.1)  | 8 (72.7)    | 0.55                     | 0.84                  | >0.99                          | 0.39                         | 0.60                         | 0.86                |
| Auto                                                                | 5 (12.5)            | 3 (10.3)         | 9 (16.7)   | 25 (15.1)   | 3 (27.3)    |                          |                       |                                |                              |                              |                     |
| Allo                                                                | 1 (2.5)             | 1 (3.4)          | 0          | 3 (1.8)     | 0           |                          |                       |                                |                              |                              |                     |
| <b>Refractory, N (%)</b>                                            |                     |                  |            |             |             |                          |                       |                                |                              |                              |                     |
| No                                                                  | 18 (46.2)           | 16 (55.2)        | 29 (54.7)  | 93 (58.9)   | 4 (40.0)    | 0.53                     | 0.21                  | 0.62                           | >0.99                        | 0.84                         | 0.63                |
| Yes                                                                 | 21 (53.8)           | 13 (44.8)        | 24 (45.3)  | 65 (41.1)   | 6 (60.0)    |                          |                       |                                |                              |                              |                     |
| Missing/unknown                                                     | 1                   | 0                | 1          | 8           | 1           |                          |                       |                                |                              |                              |                     |
| <b>Response to last line, N (%)</b>                                 |                     |                  |            |             |             |                          |                       |                                |                              |                              |                     |
| CMR/PR                                                              | 15 (37.5)           | 12 (41.4)        | 12 (22.2)  | 38 (22.9)   | 5 (45.5)    | 0.11                     | 0.070                 | 0.81                           | 0.080                        | 0.063                        | >0.99               |
| SD/PD                                                               | 25 (62.5)           | 17 (58.6)        | 42 (77.8)  | 128 (77.1)  | 6 (54.5)    |                          |                       |                                |                              |                              |                     |

**Sup. Table 3: Demographics for all leukapheresed patients at submission by bridging chemotherapy.** P-values are chi squared or Fisher's exact test (discrete variables) or Wilcoxon Mann-Whitney (continuous). Key: BT= etc. Note: one missing chemo regimen (i.e. N=228 not 229 as above)

|                                                                  | Low Dose<br>N=51 | High dose<br>N=84 | RBP<br>N=77   | p-value<br>low vs<br>high | p-value<br>low vs<br>RBP | p-value<br>high vs<br>RBP |
|------------------------------------------------------------------|------------------|-------------------|---------------|---------------------------|--------------------------|---------------------------|
| <b>Age</b>                                                       | 65.0(52 - 70)    | 56.0(47 - 63.5)   | 63.0(53 - 70) | 0.0016                    | 0.75                     | 0.0036                    |
| <b>Sex, N (%)</b>                                                |                  |                   |               |                           |                          |                           |
| Male                                                             | 33 (64.7)        | 60 (71.4)         | 41 (53.2)     | 0.41                      | 0.20                     | 0.017                     |
| Female                                                           | 18 (35.3)        | 24 (28.6)         | 36 (46.8)     |                           |                          |                           |
| <b>Disease type, N (%)</b>                                       |                  |                   |               |                           |                          |                           |
| De novo DLBCL                                                    | 30 (58.8)        | 60 (71.4)         | 57 (74.0)     | 0.30                      | 0.095                    | 0.21                      |
| PMBL                                                             | 5 (9.8)          | 5 (6.0)           | 1 (1.3)       |                           |                          |                           |
| tFL                                                              | 11 (21.6)        | 16 (19.0)         | 12 (15.6)     |                           |                          |                           |
| t-Other                                                          | 5 (9.8)          | 3 (3.6)           | 7 (9.1)       |                           |                          |                           |
| <b>DHL/THL, N (%)</b>                                            |                  |                   |               |                           |                          |                           |
| No                                                               | 30 (66.7)        | 46 (61.3)         | 52 (80.0)     | 0.12                      | 0.22                     | 0.026                     |
| Yes                                                              | 3 (6.7)          | 15 (20.0)         | 4 (6.2)       |                           |                          |                           |
| DE/TE                                                            | 12 (26.7)        | 14 (18.7)         | 9 (13.8)      |                           |                          |                           |
| Missing/unknown                                                  | 6                | 9                 | 12            |                           |                          |                           |
| <b>Stage, N (%)</b>                                              |                  |                   |               |                           |                          |                           |
| Stage 1-2                                                        | 11 (21.6)        | 7 (8.3)           | 15 (19.7)     | 0.029                     | 0.80                     | 0.037                     |
| Stage 3-4                                                        | 40 (78.4)        | 77 (91.7)         | 61 (80.3)     |                           |                          |                           |
| Missing/unknown                                                  | 0                | 0                 | 1             |                           |                          |                           |
| <b>ECOG, N (%)</b>                                               |                  |                   |               |                           |                          |                           |
| 0                                                                | 22 (43.1)        | 30 (35.7)         | 28 (36.4)     | 0.47                      | 0.46                     | >0.99                     |
| 1                                                                | 29 (56.9)        | 54 (64.3)         | 49 (63.6)     |                           |                          |                           |
| <b>Bulk&gt;7.5cm, N (%)</b>                                      |                  |                   |               |                           |                          |                           |
| No                                                               | 35 (68.6)        | 57 (67.9)         | 57 (74.0)     | >0.99                     | 0.55                     | 0.49                      |
| Yes                                                              | 16 (31.4)        | 27 (32.1)         | 20 (26.0)     |                           |                          |                           |
| Missing/unknown                                                  | 0                | 0                 | 0             |                           |                          |                           |
| <b>No. Extra nodal sites, N (%)</b>                              |                  |                   |               |                           |                          |                           |
| None                                                             | 14 (27.5)        | 21 (25.0)         | 24 (31.2)     | 0.86                      | 0.78                     | 0.58                      |
| 1-2                                                              | 34 (66.7)        | 52 (61.9)         | 42 (54.5)     |                           |                          |                           |
| 3+                                                               | 3 (5.9)          | 11 (13.1)         | 11 (14.3)     |                           |                          |                           |
| <b>LDH, N (%)</b>                                                |                  |                   |               |                           |                          |                           |
| <ULN                                                             | 8 (16.3)         | 13 (16.5)         | 19 (25.3)     | 0.10                      | 0.66                     | 0.036                     |
| >ULN                                                             | 31 (63.3)        | 35 (44.3)         | 38 (50.7)     |                           |                          |                           |
| >2ULN                                                            | 10 (20.4)        | 31 (39.2)         | 18 (24.0)     |                           |                          |                           |
| Missing/unknown                                                  | 2                | 5                 | 2             |                           |                          |                           |
| <b>IPI, N (%)</b>                                                |                  |                   |               |                           |                          |                           |
| 0-2                                                              | 19 (39.6)        | 43 (51.2)         | 31 (42.5)     | 0.20                      | 0.75                     | 0.28                      |
| 3+                                                               | 29 (60.4)        | 41 (48.8)         | 42 (57.5)     |                           |                          |                           |
| Missing/unknown                                                  | 3                | 0                 | 4             |                           |                          |                           |
| <b>Fit for SCT?, N (%)</b>                                       |                  |                   |               |                           |                          |                           |
| No                                                               | 9 (17.6)         | 12 (14.3)         | 22 (28.6)     | 0.63                      | 0.21                     | 0.033                     |
| Yes                                                              | 42 (82.4)        | 72 (85.7)         | 55 (71.4)     |                           |                          |                           |
| <b>HCT-CI score</b>                                              |                  |                   |               |                           |                          |                           |
| <3                                                               | 49 (98.0)        | 80 (95.2)         | 64 (84.2)     | 0.65                      | 0.015                    | 0.032                     |
| 3+                                                               | 1 (2.0)          | 4 (4.8)           | 12 (15.8)     |                           |                          |                           |
| Missing/unknown                                                  | 1                | 0                 | 1             |                           |                          |                           |
| <b>Life expectancy &lt;3 months if<br/>no response BT, N (%)</b> |                  |                   |               |                           |                          |                           |
| No                                                               | 9 (17.6)         | 12 (14.3)         | 22 (28.6)     | <0.001                    | 0.13                     | 0.018                     |
| Yes                                                              | 42 (82.4)        | 72 (85.7)         | 55 (71.4)     |                           |                          |                           |
| <b>&gt; 2 previous lines, N (%)</b>                              |                  |                   |               |                           |                          |                           |
| No                                                               | 22 (43.1)        | 54 (64.3)         | 46 (59.7)     | 0.020                     | 0.073                    | 0.63                      |
| Yes                                                              | 29 (56.9)        | 30 (35.7)         | 31 (40.3)     |                           |                          |                           |
| <b>Previous transplant, N (%)</b>                                |                  |                   |               |                           |                          |                           |

|                                     | Low Dose<br>N=51 | High dose<br>N=84 | RBP<br>N=77 | p-value<br>low vs<br>high | p-value<br>low vs<br>RBP | p-value<br>high vs<br>RBP |
|-------------------------------------|------------------|-------------------|-------------|---------------------------|--------------------------|---------------------------|
| No                                  | 42 (82.4)        | 67 (79.8)         | 63 (81.8)   | 0.40                      | >0.99                    | 0.52                      |
| Auto                                | 9 (17.6)         | 13 (15.5)         | 13 (16.9)   |                           |                          |                           |
| Allo                                | 0                | 4 (4.8)           | 1 (1.3)     |                           |                          |                           |
| <b>Refractory, N (%)</b>            |                  |                   |             |                           |                          |                           |
| No                                  | 31 (62.0)        | 45 (56.3)         | 40 (55.6)   | 0.59                      | 0.58                     | >0.99                     |
| Yes                                 | 19 (38.0)        | 35 (43.8)         | 32 (44.4)   |                           |                          |                           |
| Missing/unknown                     | 1                | 4                 | 5           |                           |                          |                           |
| <b>Response to last line, N (%)</b> |                  |                   |             |                           |                          |                           |
| CMR/PR                              | 10 (19.6)        | 22 (26.2)         | 18 (23.4)   | 0.41                      | 0.67                     | 0.72                      |
| SD/PD                               | 41 (80.4)        | 62 (73.8)         | 59 (76.6)   |                           |                          |                           |

**Sup. Table 4: Bridging chemotherapy and selected patient demographics by time period: 2018/2019 vs 2019/2020. p-values are Fisher's exact tests. Demographics - P-values are Wilcoxon Mann Whitney (continuous variables), Chi-squared (\*trend) or Fisher's exact (discrete).**

| Bridging type                          | Time period       |                   | p-value |
|----------------------------------------|-------------------|-------------------|---------|
|                                        | Dec 2018-Dec 2019 | Dec 2019-Dec 2020 |         |
| <b>Bridging type</b>                   |                   |                   |         |
| None                                   | 32 (15.2)         | 17 (10.4)         | <0.001  |
| Steroids alone                         | 32 (15.2)         | 3 (1.8)           |         |
| RT                                     | 31 (14.7)         | 31 (19.9)         |         |
| Systemic                               | 108 (51.2)        | 105 (64.0)        |         |
| CMT                                    | 8 (3.8)           | 8 (4.9)           |         |
| <b>Systemic type (inc. CMT)</b>        |                   |                   |         |
| HDT-Gem                                | 28 (24.4)         | 9 (8.0)           | <0.001  |
| HDT-Ifos                               | 24 (20.9)         | 7 (6.2)           |         |
| HDT-Other                              | 40 (34.8)         | 13 (11.5)         |         |
| Low dose                               | 16 (13.9)         | 7 (6.2)           |         |
| RBP                                    | 7 (6.1)           | 77 (68.1)         |         |
| <b>Systemic type (inc CMT, ex RBP)</b> |                   |                   |         |
| HDT-Gem                                | 28 (25.9)         | 9 (25.0)          | 0.92    |
| HDT-Ifos                               | 24 (22.2)         | 7 (19.4)          |         |
| HDT-Other                              | 40 (37.0)         | 13 (36.1)         |         |
| Low dose                               | 16 (14.8)         | 7 (19.4)          |         |
| <b>Demographics</b>                    |                   |                   |         |
| Age                                    | 58.0(49 – 66)     | 62.5(53 – 69)     | 0.011   |
| <b>IPI, N (%)</b>                      |                   |                   |         |
| 0-2                                    | 116 (57.1)        | 63 (41.4)         | 0.003   |
| 3+                                     | 87 (42.9)         | 89 (58.6)         |         |
| Missing/unknown                        | 8                 | 12                |         |
| <b>Fit for SCT?, N (%)</b>             |                   |                   |         |
| No                                     | 33 (15.6)         | 39 (23.8)         | 0.047   |
| Yes                                    | 178 (84.4)        | 125 (76.2)        |         |
| <b>Refractory, N (%)</b>               |                   |                   |         |
| No                                     | 127 (61.4)        | 78 (50.3)         | 0.036   |
| Yes                                    | 80 (38.6)         | 77 (49.7)         |         |
| Missing/unknown                        | 4                 | 9                 |         |

**Sup. Table 5: Toxicity from CAR-T by CT type.** <sup>1</sup>Patients with PD are excluded, <sup>2</sup>Infection details: Low dose; Covid (N=1), sepsis (N=2), High dose: sepsis (N=1), Fungal chest infection (N=1), RBP: Covid (N=4), Necrotizing fasciitis (N=1), Sepsis (N=1) Covid-19, steroids; RSV pneumonia, RT; Sepsis (NOS), Systemic; Covid-19 (N=5), Fungal chest infection/HLH (N=1), Necrotizing fasciitis(N=1), sepsis (NOS) (N=3), fungal sepsis (N=1) Notes: one ITU level missing (CT bridging).

|                                                   | Low Dose<br>N=42  | High Dose<br>N=58  | RBP<br>N=66        | p-value |
|---------------------------------------------------|-------------------|--------------------|--------------------|---------|
| <b>CAR-T toxicities</b>                           |                   |                    |                    |         |
| CRS (grade 3+), N(%)                              | 4 (9.5)           | 2 (3.5)            | 5 (7.6)            | 0.45    |
| ICANS (grade 3+), N(%)                            | 8 (19.1)          | 10 (17.2)          | 8 (12.1)           | 0.59    |
| Grade 3+ Neutropenia (1 month) <sup>1</sup>       | 14 (51.9)         | 31 (77.5)          | 19 (40.4)          | 0.002   |
| Grade 3+ Neutropenia (3 months) <sup>1</sup>      | 3 (17.7)          | 3 (15.0)           | 7 (23.3)           | 0.80    |
| Grade 3+ Thrombocytopenia (1 month) <sup>1</sup>  | 15 (55.6)         | 30 (73.2)          | 20 (41.7)          | 0.012   |
| Grade 3+ Thrombocytopenia (3 months) <sup>1</sup> | 4 (23.5)          | 6 (30.0)           | 5 (16.7)           | 0.53    |
| <b>Toxicity therapies</b>                         |                   |                    |                    |         |
| Steroids given, N(%)                              | 16 (38.1)         | 22 (37.9)          | 23 (34.9)          | 0.94    |
| Tocilizumab used, N(%)                            | 28 (66.7)         | 39 (67.2)          | 47 (71.2)          | 0.85    |
| ITU required, N(%)                                | 15 (35.7)         | 16 (27.6)          | 15 (22.7)          | 0.35    |
| Observation only                                  | 5 (11.9)          | 6 (10.5)           | 4 (6.1)            |         |
| Inotropes                                         | 5 (11.9)          | 5 (8.8)            | 6 (9.1)            |         |
| Organ support/Intubation                          | 5 (11.9)          | 4 (7.0)            | 5 (7.6)            |         |
| Cumulative incidence of NRM at 1 year             | 7.4% (2.4 – 21.2) | 9.33% (3.9 – 21.2) | 11.6% (5.2 – 25.8) |         |
| NRM events                                        | 4                 | 5                  | 6                  | 0.97    |
| Infection <sup>2</sup>                            | 3                 | 2                  | 6                  |         |
| Cardiac                                           | 0                 | 0                  | 0                  |         |
| Haematemesis                                      | 0                 | 0                  | 0                  |         |
| Second malignancy                                 | 0                 | 1                  | 0                  |         |
| HLH                                               | 0                 | 1                  | 0                  |         |
| Bowel perforation                                 | 1                 | 1                  | 0                  |         |

**Sup. Table 6: Toxicity according to BT response.**

|                                                   | No response<br>N=115 | PR<br>N=83   | CR<br>N=21  | p-value |
|---------------------------------------------------|----------------------|--------------|-------------|---------|
| <b>CAR-T toxicities</b>                           |                      |              |             |         |
| CRS (grade 3+), N(%)                              | 12 (10.4)            | 5 (6.0)      | 1 (4.8)     | 0.58    |
| ICANS (grade 3+), N(%)                            | 25 (21.7)            | 5 (6.0)      | 2 (9.5)     | 0.005   |
| Grade 3+ Neutropenia (1 month) <sup>1</sup>       | 43/80 (53.8)         | 27/66 (40.9) | 8/18 (44.4) | 0.29    |
| Grade 3+ Neutropenia (3 months) <sup>1</sup>      | 7/40 (17.5)          | 4/46 (8.7)   | 7/14 (50.0) | 0.004   |
| Grade 3+ Thrombocytopenia (1 month) <sup>1</sup>  | 43/79 (54.4)         | 33/63 (52.4) | 7/18 (38.9) | 0.52    |
| Grade 3+ Thrombocytopenia (3 months) <sup>1</sup> | 9/40 (22.5)          | 7/46 (15.2)  | 4/14 (28.6) | 0.46    |
| <b>Toxicity therapies</b>                         |                      |              |             |         |
| Steroids given, N(%)                              | 52 (45.2)            | 23 (27.7)    | 9 (42.9)    | 0.037   |
| Tocilizumab used, N(%)                            | 84 (73.0)            | 56 (67.5)    | 13 (61.9)   | 0.49    |
| ITU required, N(%)                                | 38 (33.0)            | 19 (22.9)    | 3 (14.3)    | 0.12    |
| Observation only                                  | 7 (6.1)              | 11 (13.3)    | 0           |         |
| Inotropes                                         | 17 (14.9)            | 6 (7.2)      | 1 (4.8)     |         |
| Organ support/Intubation                          | 13 (11.4)            | 2 (2.4)      | 2 (9.5)     |         |



**Sup. Table 7. CAR-T response in the non-responders to BT, by product. \*Excluding not done.**

| <b>PET response</b> | <b>Axi-cel<br/>N=92</b> | <b>Tisa-cel<br/>N=23</b> |                |
|---------------------|-------------------------|--------------------------|----------------|
| <b>1 month</b>      |                         |                          |                |
| CR                  | 35 (40.7)               | 4 (17.4)                 |                |
| PR                  | 31 (36.1)               | 6 (26.1)                 |                |
| SD                  | 3 (3.5)                 | 0                        |                |
| PD                  | 14 (16.3)               | 13 (56.5)                |                |
| Patient died        | 3 (3.5)                 | 0                        |                |
| Not done            |                         | 0                        |                |
| <b>ORR</b>          | <b>66 (71.7)</b>        | <b>10 (43.5)</b>         | <b>p=0.010</b> |
| <b>ORR*</b>         | <b>66 (76.7)</b>        | <b>10 (43.5)</b>         | <b>P=0.002</b> |
| <b>3 months</b>     |                         |                          |                |
| CR                  | 36 (39.1)               | 2 (8.7)                  |                |
| PR                  | 7 (7.6)                 | 0                        |                |
| PD                  | 41 (44.6)               | 21 (91.3)                |                |
| Patient died        | 8 (8.7)                 | 0                        |                |
| <b>ORR</b>          | <b>43 (46.7)</b>        | <b>2 (8.7)</b>           | <b>p=0.001</b> |
|                     | <b>Axi-cel<br/>N=88</b> | <b>Tisagen<br/>N=21</b>  |                |
| <b>6 months</b>     |                         |                          |                |
| CR                  | 30 (37.5)               | 1 (4.8%)                 |                |
| PR                  | 4 (4.6)                 | 0                        |                |
| PD                  | 44 (50.0)               | 20 (95.2)                |                |
| Patient died        | 10 (11.4)               | 0                        |                |
| <b>ORR</b>          | <b>34 (38.6)</b>        | <b>1 (4.8)</b>           | <b>p=0.003</b> |

**Sup. Table 8: Baseline characteristics of the infused non-responders by product.** We reviewed outcomes for all patients who were bridged, with deaths/non-infusion due to PD included as non-responders. We excluded the RT cohort from this analysis as they represent a highly selected group, often with limited stage disease and response may be localised.

|                                                                 | All infused patients<br>N=115 | Axi-cel<br>N=92    | Tisagen<br>N=23   | p-value     |
|-----------------------------------------------------------------|-------------------------------|--------------------|-------------------|-------------|
| <b>Age</b>                                                      | 56.0(22 - 78)                 | 56.0(22 - 78)      | 58.0(30 - 76)     | 0.088       |
| <b>Sex, N (%)</b>                                               |                               |                    |                   |             |
| Male                                                            | 74 (64.3)                     | 59 (64.1)          | 15 (65.2)         | 0.92        |
| Female                                                          | 41 (35.7)                     | 33 (35.9)          | 8 (34.8)          |             |
| <b>ECOG, N (%)</b>                                              |                               |                    |                   |             |
| 0                                                               | 49 (42.6)                     | 40 (43.5)          | 9 (39.1)          | 0.71        |
| 1                                                               | 66 (57.4)                     | 52 (56.5)          | 14 (60.9)         |             |
| <b>Stage, N (%)</b>                                             |                               |                    |                   |             |
| Stage 1-2                                                       | 16 (14.0)                     | 14 (15.4)          | 2 (8.7)           | 0.52*       |
| Stage 3-4                                                       | 98 (86.0)                     | 77 (84.6)          | 21 (91.3)         |             |
| Missing/unknown                                                 | 1                             | 1                  | 0                 |             |
| <b>Bulk&gt;7.5cm, N (%)</b>                                     |                               |                    |                   |             |
| No                                                              | 77 (67.0)                     | 58 (63.0)          | 19 (82.6)         | 0.074       |
| Yes                                                             | 38 (33.0)                     | 34 (37.0)          | 4 (17.4)          |             |
| <b>No. of extra nodal site, N (%)</b>                           |                               |                    |                   |             |
| 0                                                               | 33 (28.7)                     | 26 (28.3)          | 7 (30.4)          | 0.92**      |
| 1                                                               | 73 (63.5)                     | 59 (64.1)          | 14 (60.9)         |             |
| 2                                                               | 9 (7.8)                       | 7 (7.6)            | 2 (8.7)           |             |
| <b>IPI, N (%)</b>                                               |                               |                    |                   |             |
| 0-2                                                             | 56 (51.4)                     | 47 (54.0)          | 9 (40.9)          | 0.27        |
| 3+                                                              | 53 (48.6)                     | 40 (46.0)          | 13 (59.1)         |             |
| Missing/unknown                                                 | 6                             | 5                  | 1                 |             |
| <b>Histological subtype, N (%)</b>                              |                               |                    |                   |             |
| De novo DLBCL                                                   | 79 (68.7)                     | 60 (65.2)          | 19 (82.6)         | 0.29*       |
| PMBL                                                            | 10 (8.7)                      | 10 (10.9)          | 0                 |             |
| tFL                                                             | 21 (18.3)                     | 18 (19.6)          | 3 (13.0)          |             |
| t-Other                                                         | 5 (4.3)                       | 4 (4.3)            | 1 (4.3)           |             |
| <b>DHL/THL, N (%)</b>                                           |                               |                    |                   |             |
| No                                                              | 71 (71.0)                     | 58 (71.6)          | 13 (68.4)         | 0.85*       |
| Yes                                                             | 17 (17.0)                     | 14 (17.3)          | 3 (15.8)          |             |
| DHE/THE                                                         | 12 (12.0)                     | 9 (11.1)           | 3 (15.8)          |             |
| Missing/unknown                                                 | 15                            | 11                 | 4                 |             |
| <b>LDH, N (%)</b>                                               |                               |                    |                   |             |
| <ULN                                                            | 23 (21.1)                     | 19 (21.8)          | 4 (18.2)          | 0.92*       |
| >ULN                                                            | 52 (47.7)                     | 40 (46.0)          | 12 (54.5)         |             |
| >2ULN                                                           | 34 (31.2)                     | 28 (32.2)          | 6 (27.3)          |             |
| Missing/unknown                                                 | 6                             | 5                  | 1                 |             |
| <b>Life expectancy &lt;3 months if no response to BT, N (%)</b> |                               |                    |                   |             |
| No                                                              | 65 (56.5)                     | 54 (58.7)          | 11 (47.8)         | 0.35        |
| Yes                                                             | 50 (43.5)                     | 38 (41.3)          | 12 (52.2)         |             |
| <b>Fit for SCT?, N (%)</b>                                      |                               |                    |                   |             |
| No                                                              | 15 (13.0)                     | 9 (9.8)            | 6 (26.1)          | 0.076*      |
| Yes                                                             | 100 (87.0)                    | 83 (90.2)          | 17 (73.9)         |             |
| <b>3 or more lines, N (%)</b>                                   |                               |                    |                   |             |
| No                                                              | 75 (65.2)                     | 60 (65.2)          | 15 (65.2)         | >0.99       |
| Yes                                                             | 40 (34.8)                     | 32 (34.8)          | 8 (34.8)          |             |
| <b>Previous transplant, N (%)</b>                               |                               |                    |                   |             |
| No                                                              | 102 (88.7)                    | 81 (88.0)          | 21 (91.3)         | >0.99*      |
| Auto                                                            | 12 (10.4)                     | 10 (10.9)          | 2 (8.7)           |             |
| Allo                                                            | 1 (0.9)                       | 1 (1.1)            | 0                 |             |
| <b>Response to last line, N (%)</b>                             |                               |                    |                   |             |
| CMR/PR                                                          | 20 (17.4)                     | 17 (18.5)          | 3 (13.0)          | 0.76*       |
| SD/PD                                                           | 95 (82.6)                     | 75 (81.5)          | 20 (87.0)         |             |
| <b>No previous response, N (%)</b>                              |                               |                    |                   |             |
| Previous response                                               | 69 (62.2)                     | 53 (58.9)          | 16 (76.2)         | 0.14        |
| Refractory                                                      | 42 (37.8)                     | 37 (41.1)          | 5 (23.8)          |             |
| Missing/unknown                                                 | 4                             | 2                  | 2                 |             |
| <b>Duration of response for last line (CMR only)</b>            | <b>7.0(3 - 23)</b>            | <b>8.0(3 - 23)</b> | <b>3.5(3 - 4)</b> | <b>0.11</b> |
| <b>Pre-infusion factors</b>                                     |                               |                    |                   |             |
| <b>ECOG, N (%)</b>                                              |                               |                    |                   |             |

|                                 | All infused patients<br>N=115 | Axi-cel<br>N=92 | Tisagen<br>N=23 | p-value |
|---------------------------------|-------------------------------|-----------------|-----------------|---------|
| 0-1                             | 103 (89.6)                    | 80 (87.0)       | 23 (100.0)      | 0.12*   |
| 2                               | 12 (10.4)                     | 12 (13.0)       | 0               |         |
| <b>LDH grouped, N (%)</b>       |                               |                 |                 |         |
| <ULN                            | 24 (24.2)                     | 21 (26.6)       | 3 (15.0)        | 0.68    |
| >ULN                            | 43 (43.4)                     | 32 (40.5)       | 11 (55.0)       |         |
| >2ULN                           | 32 (32.3)                     | 26 (32.9)       | 6 (30.0)        |         |
| Missing/unknown                 | 16                            | 13              | 3               |         |
| <b>Low platelets, N (%)</b>     |                               |                 |                 |         |
| No                              | 106 (92.2)                    | 83 (90.2)       | 23 (100.0)      | 0.20*   |
| Yes                             | 9 (7.8)                       | 9 (9.8)         | 0               |         |
| <b>Low lymphocytes, N (%)</b>   |                               |                 |                 |         |
| No                              | 56 (49.6)                     | 40 (44.4)       | 16 (69.6)       | 0.032   |
| Yes                             | 57 (50.4)                     | 50 (55.6)       | 7 (30.4)        |         |
| Missing/unknown                 | 2                             | 2               | 0               |         |
| <b>Bridging response, N (%)</b> |                               |                 |                 |         |
| SD                              | 18 (15.7)                     | 14 (15.2)       | 4 (17.4)        | 0.76*   |
| PD                              | 97 (84.3)                     | 78 (84.8)       | 19 (82.6)       |         |

# Supplementary Figure 1

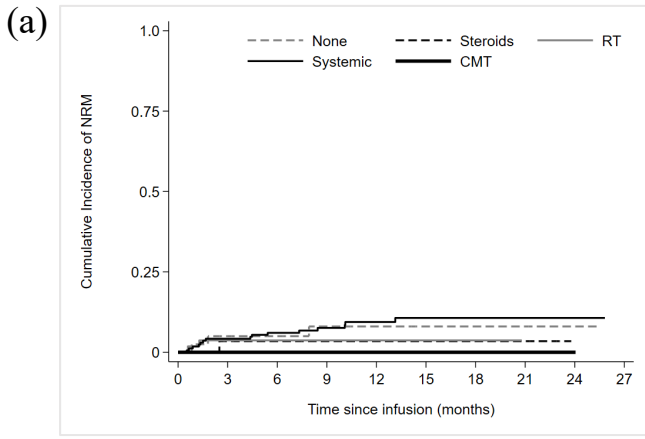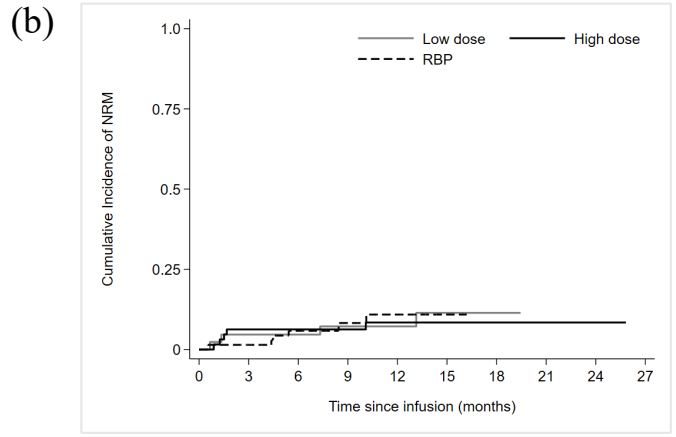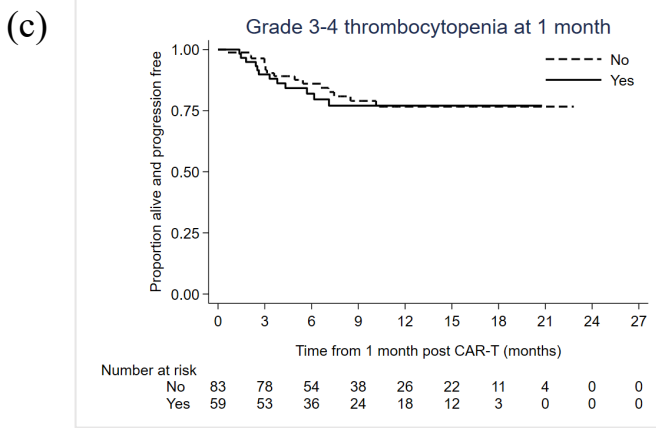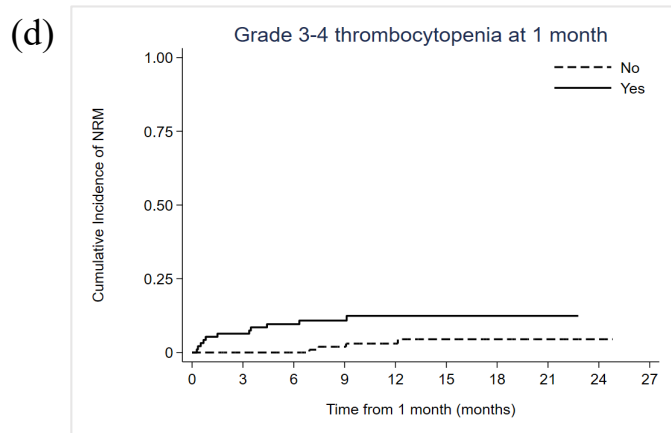

**Sup. Figure 1a:** NRM by bridging modality

**Sup. Figure 1b:** NRM by chemotherapy bridging modality

**Sup. Figure 1c:** Grade 3-4 thrombocytopenia at 1 month and PFS/relapse

**Sup. Figure 1d:** Grade 3-4 thrombocytopenia at 1 month and NRM

# Supplementary Figure 2

(a)

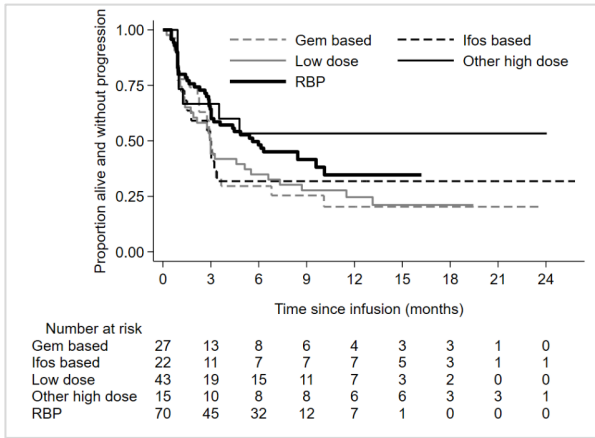

(b)

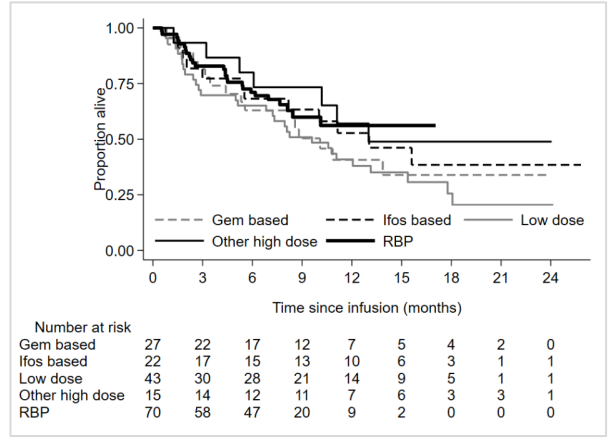

**Sup. Figure 2a: 1-year PFS rates by chemotherapy type:** HDT-Gem: 20.3% (7.3 – 37.8); HDT-Ifos: 31.8% (14.2 – 51.1); HDT-Other: 53.3% (12.8 – 38.5); LDT: 24.6 (12.8 – 38.5); RBP: 34.7% (21.4 – 48.3).

**Sup. Figure 2b: 1-year OS by chemotherapy type:** HDT-Gem: 40.7% (21.4 – 59.2); HDT-Ifos: 52.8% (29.8 – 71.3); HDT-Other: 57.0% (27.7 – 78.2); LDT: 40.9% (26.1 – 55.2); RBP: 56.2% (41.0 – 68.8)

### Supplementary Figure 3

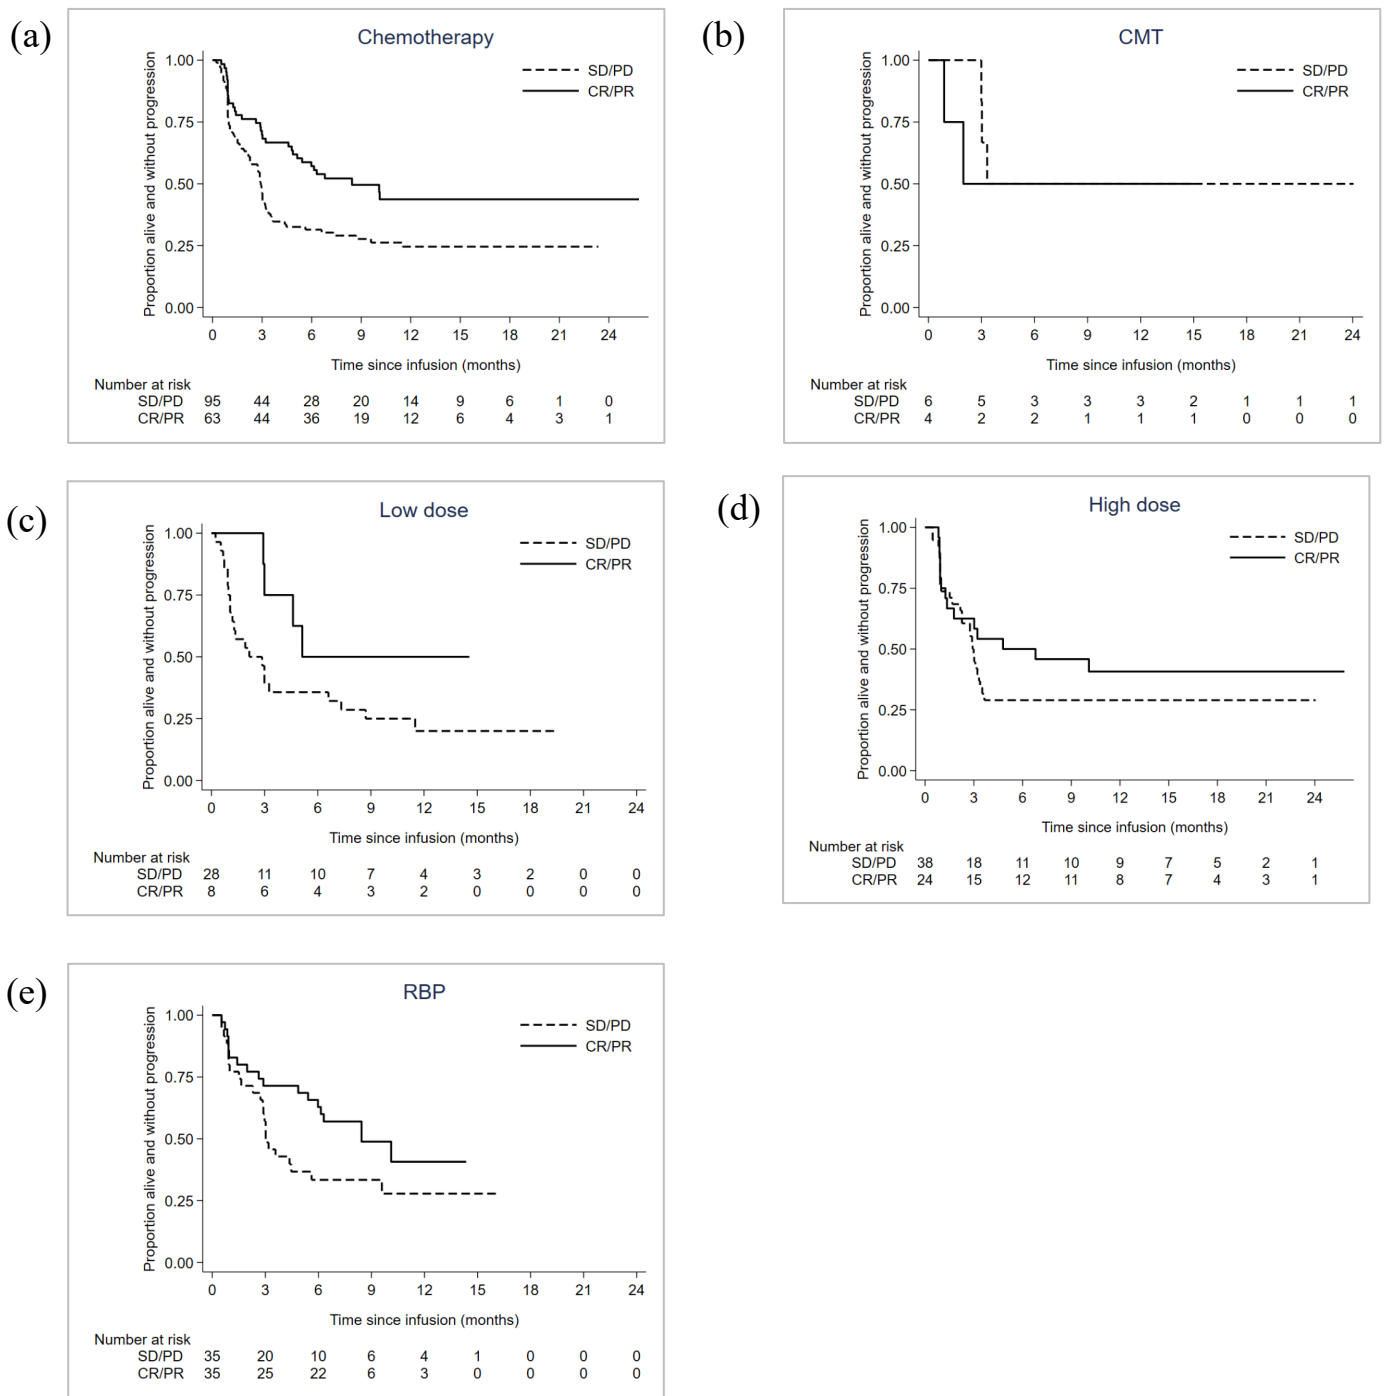

**Sup. Figure 3a: CT Responder vs non-responder:** HR 0.54 (0.35 – 0.81), p=0.003. 1-year rates: Responder: 43.7% (30.0 – 56.7); Non-Responder: 24.6% (16.1 – 34.0)

**Sup. Figure 3b: CMT Responder vs non-responder:** HR 1.37 (0.23 – 8.23), p=0.73. 1-year rates: Responder: 50.0% (5.8 – 84.5); Non-Responder: 50.0% (11.1 – 80.4)

**Sup. Figure 3c: LDT Responder vs non-responder:** HR 0.41 (0.14 – 1.19), p=0.10; 1-year rates: Responder: 50.0% (15.2 – 77.5); Non-Responder: 20.0% (7.4 – 37.0)

**Sup. Figure 3d: HDT Responder vs non-responder:** HR 0.69 (0.36 – 1.32), p=0.26. 1-year rates: Responder: 40.7% (21.1 – 59.5); Non-Responder: 29.0% (15.7 – 43.6)

**Sup. Figure 3e: RBP Responder vs non-responder:** HR 0.53 (0.31 – 1.07), p=0.083. 1-year rates: Responder: 40.7% (19.1 – 61.4); Non-Responder: 27.8% (13.0 – 44.8). Note: very few patients in follow-up at 1 year (as RBP used mostly in the second year: 6-month rates will be more reliable – can be provided).
